# Supplementary material for: Risk Perception, Protective Behaviors, and General Anxiety during the Coronavirus Disease 2019 Pandemic among Affiliated Health Care Professionals in Taiwan: Comparisons with Frontline Health Care Professionals and the General Public
Source: PubMed Central journal article supplement (PMC7764763; doi:10.3390/ijerph17249329), 2020-12-13
Supplement: ijerph-17-09329-s001.pdf [file ijerph-17-09329-s001.pdf]

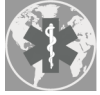

**Supplementary Table S1.** Measures used in this study.

| Measures                         | Items                                                                                                                                                                                                | Response Scale                                                                                                                                         | Scoring                                                              |
|----------------------------------|------------------------------------------------------------------------------------------------------------------------------------------------------------------------------------------------------|--------------------------------------------------------------------------------------------------------------------------------------------------------|----------------------------------------------------------------------|
| Risk perception of COVID-19      | Item 1: If you were to develop flu-like symptoms tomorrow, would you worry?                                                                                                                          | 1 = not at all worried, 2 = worried less than normal, 3 = about the same, 4 = worried more than normal, 5 = extremely worried                          | Divided by 5                                                         |
|                                  | Item 2: In the past one week, have you ever worried about catching COVID-19?                                                                                                                         | 1 = no, never think about it, 2 = think about it but it didn't worry me, 3 = worried me a bit, 4 = worried me a lot, 5 = worried about it all the time | Divided by 5                                                         |
|                                  | Item 3: Please rate the current level of your worry towards COVID-19:                                                                                                                                | Score ranged from 1–10 (1 = very mild, 10 = very severe)                                                                                               | Divided by 10                                                        |
|                                  | Item 4: How likely do you think it is that you will contract COVID-19 over the next 1 month?                                                                                                         | 1 = never, 2 = very unlikely, 3 = unlikely, 4 = evens, 5 = likely, 6 = very likely, 7 = certain                                                        | Divided by 7                                                         |
|                                  | Item 5: What do you think are your chances of getting COVID-19 over the next 1 month compared to others outside your family?                                                                         | 1 = not at all, 2 = much less, 3 = less, 4 = evens, 5 = more, 6 = much more, 7 = certain                                                               | Divided by 7                                                         |
| Adoption of protective behaviors | In the past week, did you 1) avoid going to crowded places, 2) wash your hands more often, 3) wear a mask more often, 4) maintain good indoor ventilation, and 5) disinfecting household frequently? | 0 = no, 1 = yes, but not due to COVID-19, 2 = yes, due to COVID-19                                                                                     | 0 = no (score ≤1)<br>1 = yes (score = 2)<br>Summed to obtain a score |
| General anxiety                  | Agreement on 10 statements: You feel rested/content/comfortable/relaxed/pleasant/anxious/nervous/jittery/"high strung"/over-excited and "rattled"                                                    | 1 = not at all, 2 = sometimes, 3 = moderately so, 4 = very                                                                                             | Summed to obtain a score                                             |
